# Supplementary material for: A Systematic Literature Review and Bibliometric Analysis of Ophthalmology and COVID-19 Research
Source: J Ophthalmol. 2022 May 24;2022:8195228. doi: 10.1155/2022/8195228 (PMC9133895; doi:10.1155/2022/8195228)
Supplement: Supplementary Materials — Supplementary Material 1. Search strategies Supplementary Material 2. Top ten countries regarding the number of publications per 100,000 population, per 100,000 cases of COVID-19, and per 100,000 deaths due to COVID-19. Supplementary Material 3. First authors with three or more publications by their affiliated countries. [file 8195228.f1.zip]

Archive with 3 entries (3 files):
- 8195228.f1/Supp 1.docx
- 8195228.f1/Supp 2.docx
- 8195228.f1/Supp 3.docx
